# Supplementary material for: CEBPB, C19MC, and Defective Autophagy Drive Novel Podosomal Belt to Macropinocytosis Transition, Lipid Accumulation, and HBV A-to-I RNA-editing
Source: Research Square preprint supplement (doi:10.21203/rs.3.rs-6805130/v1), 2025-10-31
Supplement: Supplementary file 1 [file 2e6b4058603cbc67a096a3e0.docx]

**Supplementary information**

**CEBPB, C19MC, and Defective Autophagy Drive Novel Podosomal Belt to Macropinocytosis Transition, Lipid Accumulation, and HBV A-to-I RNA-editing**

Goodwin G. Jinesh1,2,*,Nino Mtchedlidze1,2,†, Varsha Devarapalli1,2,†, Santanu Adhikary1,†, John H. Lockhart1, Marco Napoli1, Isha Godwin5, Michelle A. Reiser1, Ling Cen6, Xiaoxian Liu6, Sean J. Yoder7, Tania E. Mesa7, Elsa R. Flores1,3, and Andrew S. Brohl2,4,*

**Supplementary figure legend**

**Figure S1. CEBPB-LAP promotes the mitochondrial ETC system to boost the metabolic phenotypic alterations in mitochondria at the podosomal belt level**

1. Integrated TCGA-LIHC RNA-seq data (clustered into iClusters-1-3)(Cancer Genome Atlas Research Network. Electronic address and Cancer Genome Atlas Research, 2017) was classified into CEBPBHigh versus CEBPBLow groups.
2. Relative expression of CEBPB-LAP versus CEBPB-LIP isoforms in CEBPBHigh versus CEBPBLow groups (TCGA-LIHC RNA-seq). Note the relative abundance of LAP isoform in CEBPBHigh group.
3. Whole genome copy number alterations in CEBPBHigh versus CEBPBLow groups evaluated through cBioportal platform. Default color code applies.
4. Chromosome-8q copy number alterations in CEBPBHigh versus CEBPBLow groups evaluated through cBioportal platform. Default color code applies.

**Supplementary reference**

Cancer Genome Atlas Research Network. Electronic address, w.b.e., and Cancer Genome Atlas Research, N. (2017). Comprehensive and Integrative Genomic Characterization of Hepatocellular Carcinoma. Cell *169*, 1327-1341 e1323.
